# Supplementary material for: Vaccarin alleviates cisplatin-induced acute kidney injury via decreasing NOX4-derived ROS
Source: PubMed Central journal article supplement — Heliyon. 2023 Nov 2;9(11):e21231. doi: 10.1016/j.heliyon.2023.e21231 (PMC10660019; doi:10.1016/j.heliyon.2023.e21231), 2023-11-02

# Western blot

Figure 1D

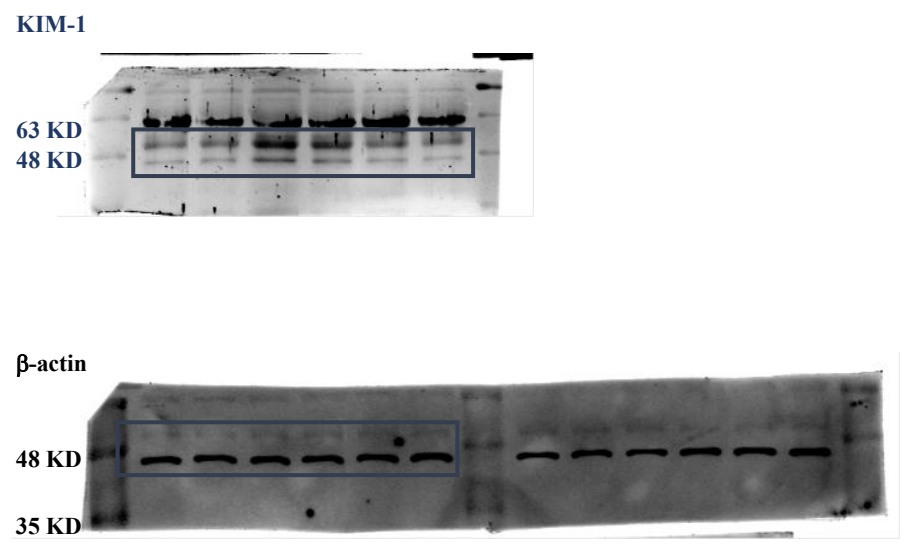

Figure 1E

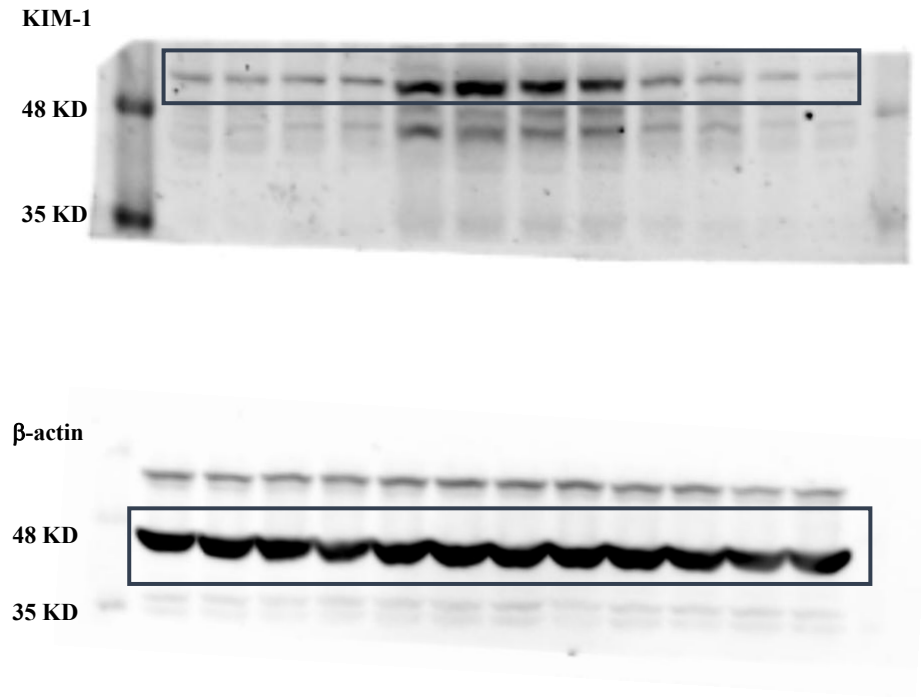

Figure 2A

NOX 4

75 KD

63 KD

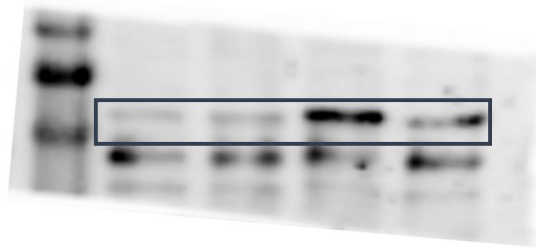

$\beta$ -actin

48 KD

35 KD

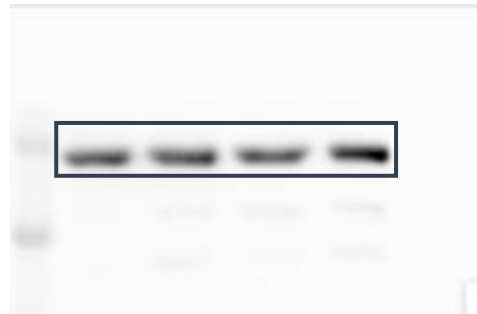

Figure 2B

NOX 4

75 KD

63 KD

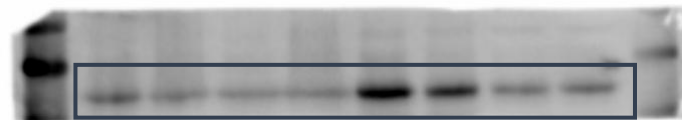

$\beta$ -actin

48 KD

35 KD

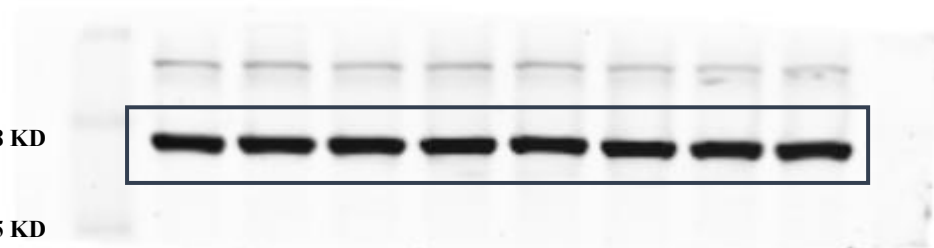

Figure 3B

p-MLKL

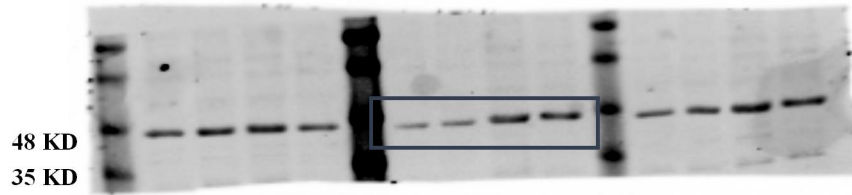

RIPK1

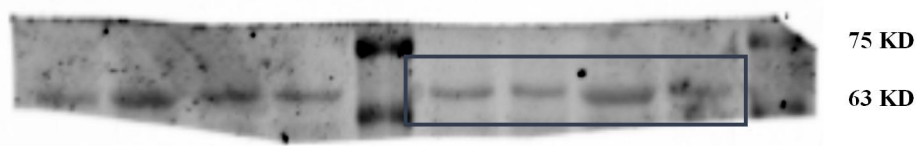

RIPK3

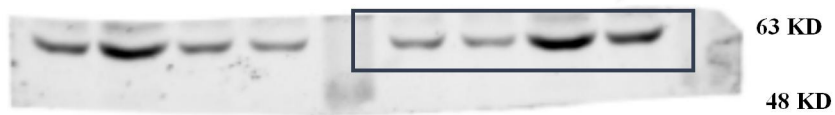

Cle-caspase 3

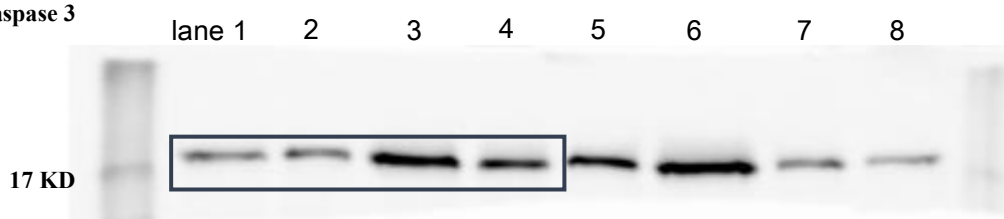

In this blot, a group of samples was loaded from lane 1 to lane 4 and another repeated group was loaded from lane 8 to lane 5, so that the changing trend of the two groups was similar.

$\beta$ -actin

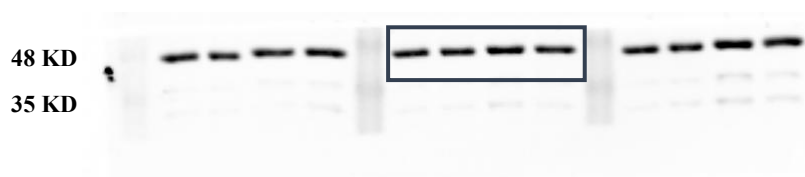

Figure 3C

p-MLKL

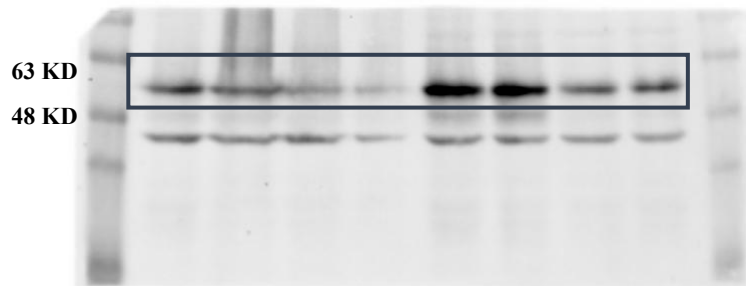

RIPK1  
75 KD  
63 KD

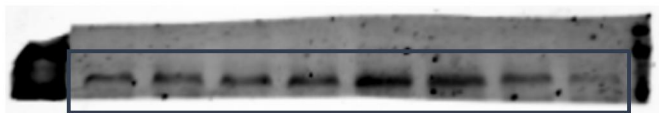

RIPK3

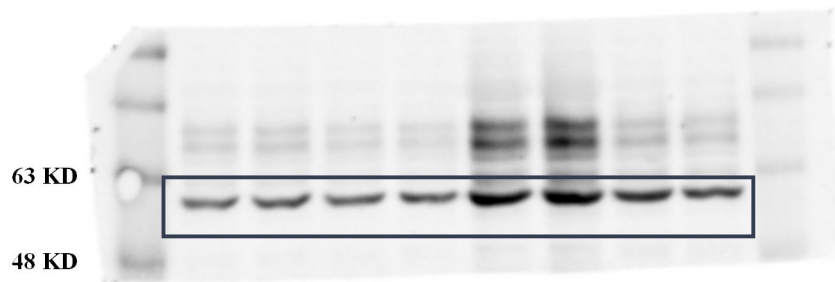

Cle-caspase 3

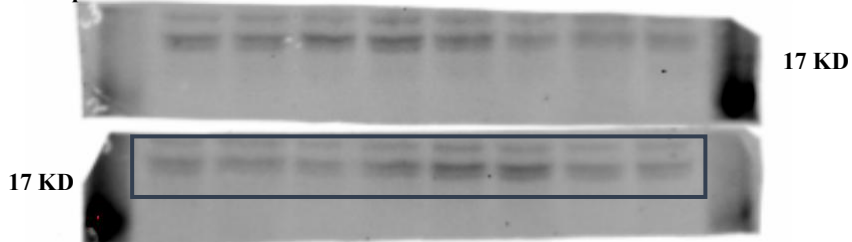

In this picture, the membrane of the two blots was put together in the machine and we take picture at one time. In one blot a group of samples was loaded from left to right and the other repeated group was loaded from right to left.

$\beta$ -actin

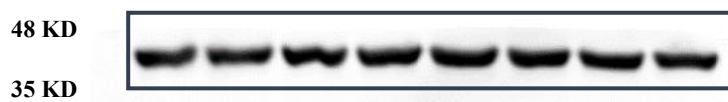

Figure 4A  
p-P65

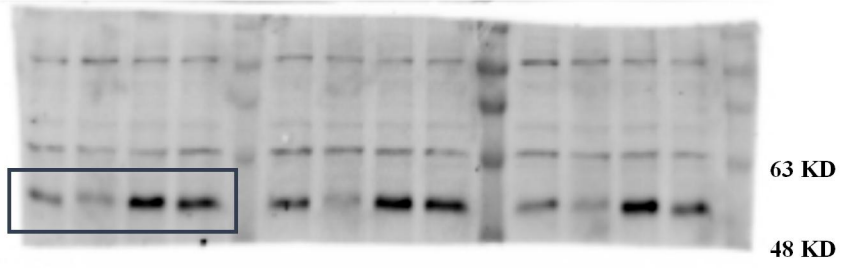

P65

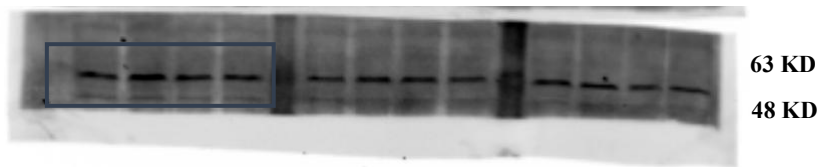

NLRP3

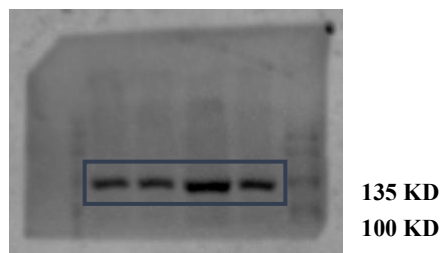

$\beta$ -actin

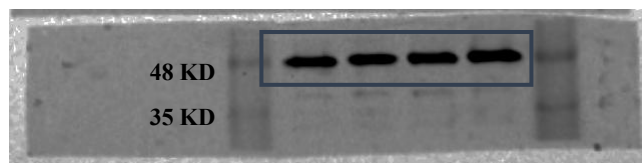

Figure 4C

p-P65

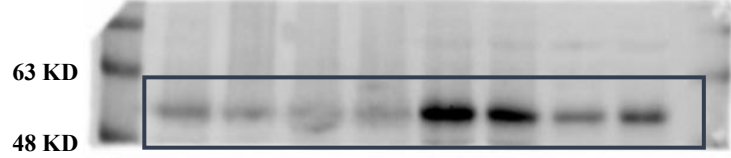

P65

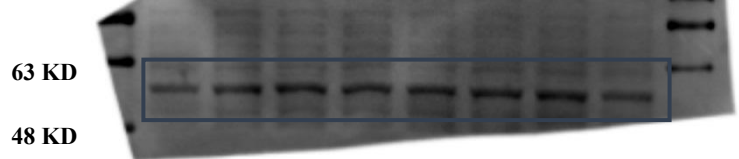

NLRP3

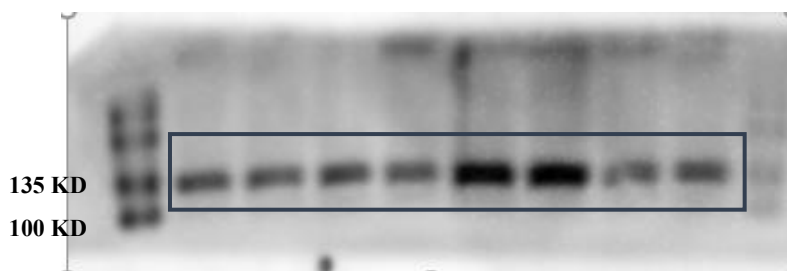

$\beta$ -actin

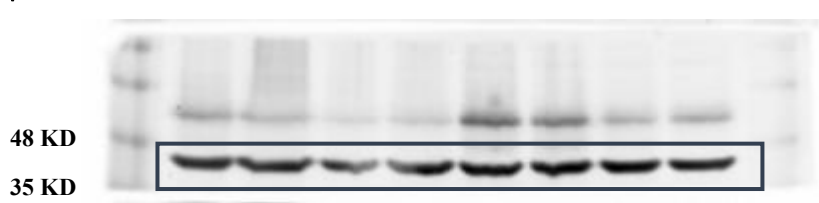

Figure 5C

p-MLKL

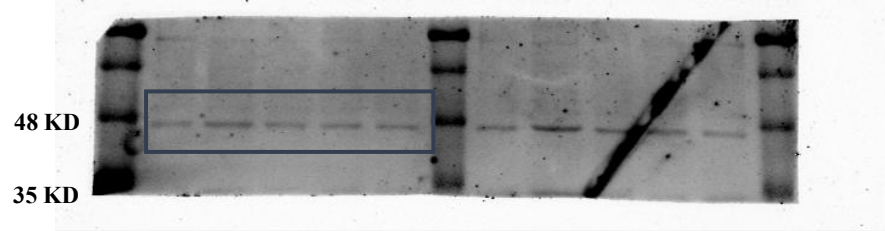

RIPK1

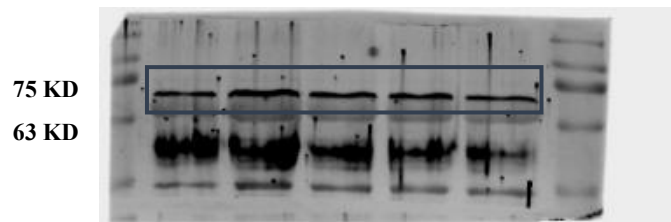

RIPK3

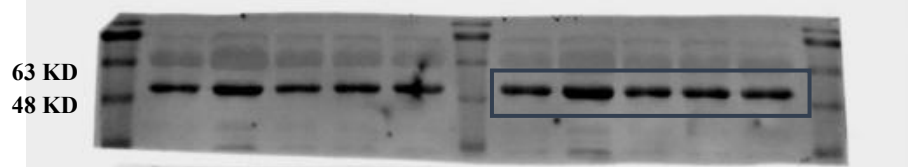

Cle-caspase 3

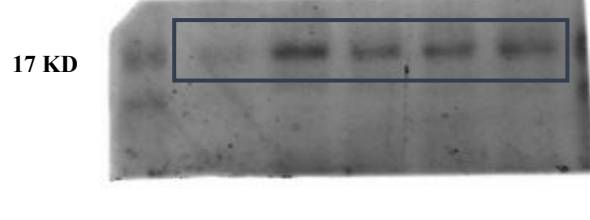

$\beta$ -actin

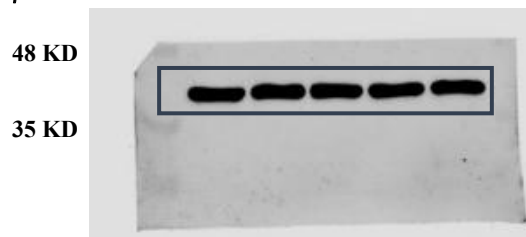

Figure 6A

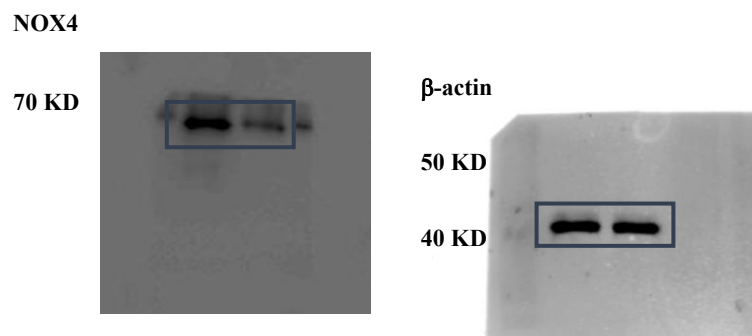

Figure 6B

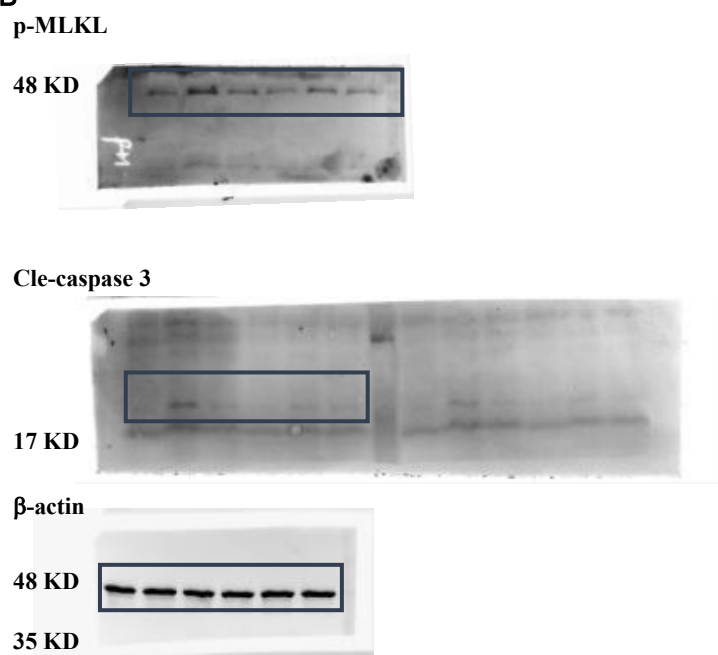

Supplement: mmc1.pdf [file mmc1.pdf]
